# Supplementary material for: Dust-producing weather patterns of the North American Great Plains
Source: Copernicus journal article supplement (doi:10.5194/egusphere-2024-2820), 2024-10-08

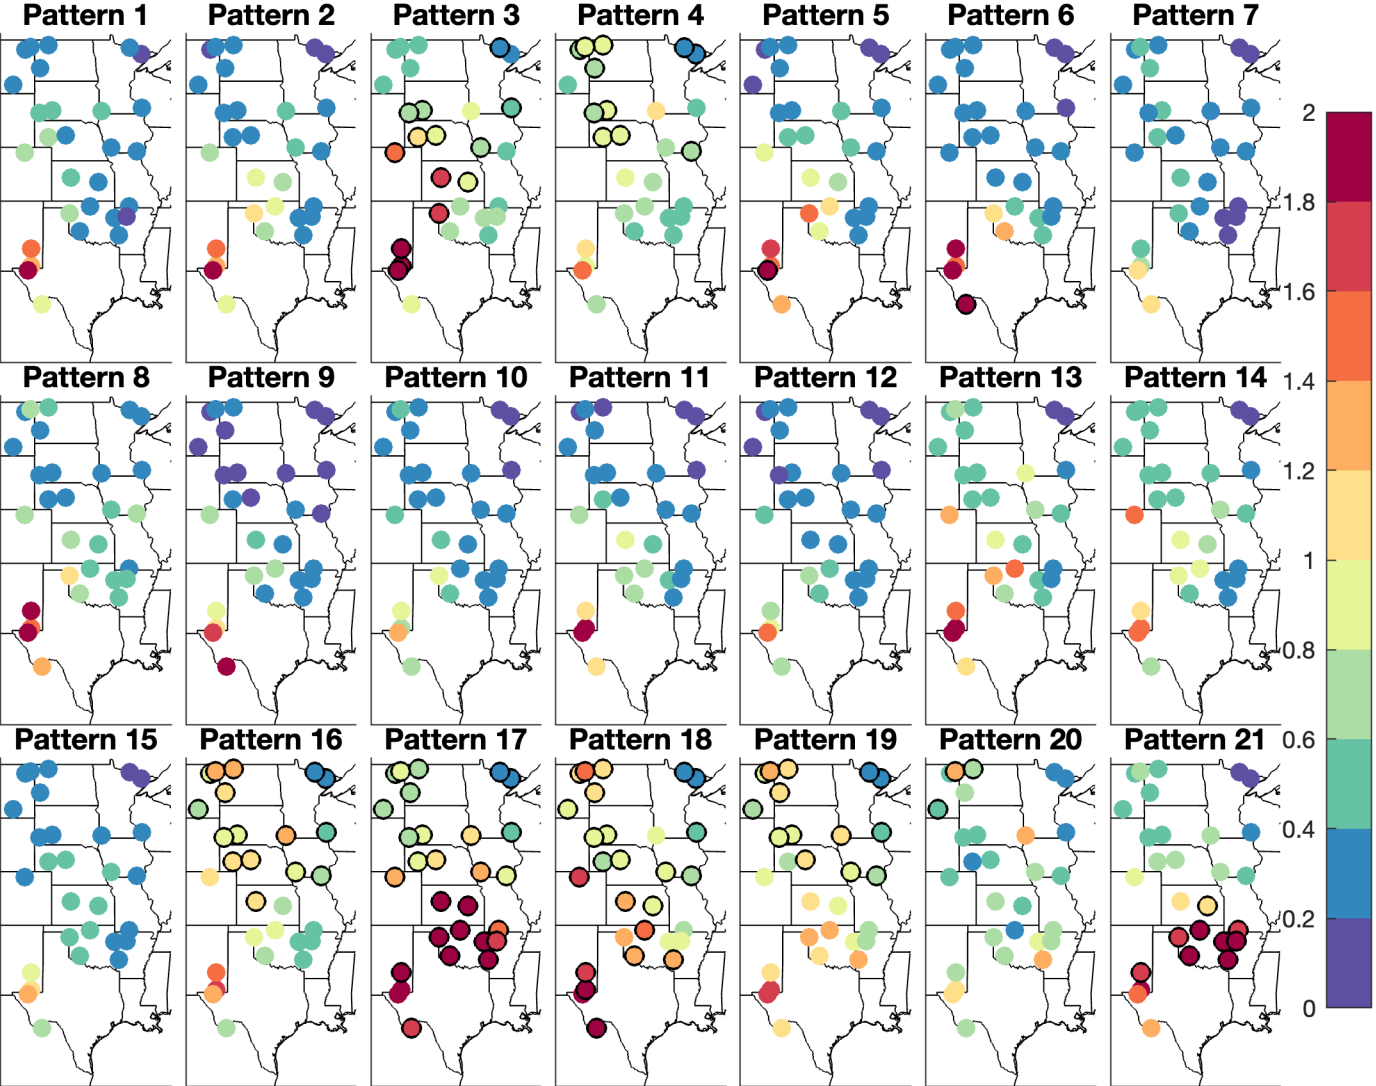

Supplement: Supplementary file [file egusphere-2024-2820-AC2-supplement.pdf]
